# Supplementary material
Source: publisher figshare collection journal article supplement (https://acs.figshare.com/ndownloader/files/8643526)
Supplement: Supplementary file 1 [file 8643526]

# Weight Averaged Anharmonic Vibrational Analysis of Hydration Structures of Polyamide 6

## Supporting Information

*Bo Thomsen,<sup>†</sup> Tomonori Kawakami,<sup>‡</sup> Isamu Shigemoto,<sup>‡</sup> Yuji Sugita,<sup>†,¶,§,||</sup> Kiyoshi Yagi<sup>\*†,¶</sup>*

<sup>†</sup> Theoretical Molecular Science Laboratory, RIKEN, 2-1 Hirosawa, Wako, Saitama 351-0198, Japan

<sup>‡</sup> Advanced Materials Research Laboratories, Toray Industries, Inc., 2-1 Sonoyama 3-chome, Otsu, Shiga 520-0842, Japan

<sup>¶</sup> RIKEN iTHES, 2-1 Hirosawa, Wako, Saitama 351-0198, Japan.

<sup>§</sup> RIKEN Advanced Institute for Computational Science, 7-1-26 Minatojima-Minamimachi, Chuo-ku, Kobe, Hyogo 650-0047, Japan.

<sup>||</sup> RIKEN Quantitative Biology Center, 6-7-1 Minatojima-Minamimachi, Chuo-ku, Kobe, Hyogo 650-0047, Japan.

\*kiyoshi.yagi@riken.jp

## S1 Force field parameters for polyamide 6

The force field used to model polyamide 6 (PA6) in this study are parameterized using the form of the CHARMM force field, *i.e.* based on bond lengths, angles, dihedral angles and pairs of non-bonding interactions. The parameters are assigned based on the atom types involved in a given interaction. The atom types in the repeating unit and the two capping groups of the PA6 chains are given in Figure S1. These types and the corresponding parameters in Table S1-S5 were assigned by similarity to parameters in the CHARMM 36 lipid force field,<sup>1</sup> the CHARMM 22 force field,<sup>2</sup> and the sphingomyelin force field.<sup>3</sup> Parameters from the various force fields were used primarily for the carbon chains, the capping groups and the amide group in the repeating unit respectively. Water was in this study modeled using the TIP3P model.<sup>4</sup>

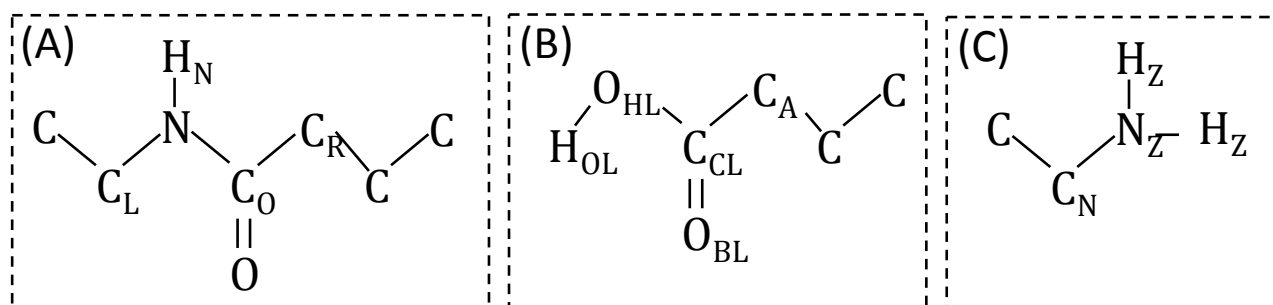

Figure S1: The topology of (A) the repeating unit of PA6, (B) the left terminal group and (C) the right terminal group. The carbon atoms C, C<sub>L</sub>, C<sub>A</sub> and C<sub>CN</sub> are all bound two hydrogen atoms, which are left out for clarity. These hydrogen atoms have the same subscript as the carbon atom they are bound to, *i.e.* C<sub>L</sub> is bound to two hydrogen atoms with the label H<sub>L</sub>.

In the following the CHARMM force field form will briefly be described, this is done for completeness and understanding of how the parameters in S1-5 is used in the model presented in Figure 5. The CHARMM force field is divided into a set of bonded and non-bonded interactions,

$$V = V_{bonded} + V_{non-bonded}. \quad (S1)$$

The non-bonded term contains two contributions,

$$V_{non-bonded} = V_{elec} + V_{LJ}. \quad (S2)$$

Both of these terms are calculated as a set of pairwise interactions, with a given cutoff length and cutoff scaling function range as described in the main text.  $V_{elec}$  is the electrostatic interactions given as the standard columbic charge interaction,

$$V_{elec} = \frac{q_i q_j}{\epsilon r_{ij}}, \quad (S3)$$

where  $q_i$  is the charge of the given atom type,  $r_{ij}$  is the distance between the atoms and  $\epsilon$  is the permittivity of vacuum. The charges for the individual atom types are given in Table S1.

Table S1 : Non-bonding parameters used for PA6 in this study.

| Atom type       | $q_i$ (C) | $\epsilon_i$ (kcal/mol) | $R_{min}/_2$ (Å) | $\epsilon_i(1 - 4)$ (kcal/mol) | $R_{min}/_2 (1 - 4)$ (Å) |
|-----------------|-----------|-------------------------|------------------|--------------------------------|--------------------------|
| C               | -0.18     | -0.056                  | 2.010            | -0.01                          | 1.90                     |
| H               | 0.09      | -0.028                  | 1.340            | -                              | -                        |
| C <sub>L</sub>  | 0.25      | -0.056                  | 2.010            | -0.01                          | 1.90                     |
| H <sub>L</sub>  | 0.05      | -0.028                  | 1.340            | -                              | -                        |
| N               | -0.70     | -0.200                  | 1.850            | -0.20                          | 1.55                     |
| H <sub>N</sub>  | 0.35      | -0.046                  | 0.2245           | -                              | -                        |
| C <sub>O</sub>  | 0.55      | -0.110                  | 2.000            | -                              | -                        |
| O               | -0.60     | -0.120                  | 1.700            | -0.12                          | 1.40                     |
| C <sub>R</sub>  | -0.07     | -0.056                  | 2.010            | -0.01                          | 1.90                     |
| H <sub>R</sub>  | 0.06      | -0.028                  | 1.340            | -                              | -                        |
| C <sub>CN</sub> | 0.13      | -0.056                  | 2.010            | -0.01                          | 1.90                     |
| H <sub>CN</sub> | 0.075     | -0.028                  | 1.340            | -                              | -                        |
| N <sub>Z</sub>  | -0.96     | -0.200                  | 1.850            | -                              | -                        |
| H <sub>Z</sub>  | 0.34      | -0.046                  | 0.2245           | -                              | -                        |
| H <sub>OL</sub> | 0.44      | -0.046                  | 0.2245           | -                              | -                        |
| O <sub>HL</sub> | -0.61     | -0.1521                 | 1.770            | -                              | -                        |
| C <sub>CL</sub> | 0.75      | -0.070                  | 2.000            | -                              | -                        |
| O <sub>BL</sub> | -0.55     | -0.120                  | 1.700            | -0.12                          | 1.40                     |
| C <sub>A</sub>  | -0.21     | -0.056                  | 2.010            | -0.01                          | 1.90                     |
| H <sub>A</sub>  | 0.09      | -0.028                  | 1.340            | -                              | -                        |

The second term in Eq. (2) is the Lenard-Jones potential, given as

$$V_{LJ} = \sqrt{\epsilon_i \epsilon_j} \left( \left( \frac{R_{min_i} + R_{min_j}}{2r_{ij}} \right)^{12} - 2 \left( \frac{R_{min_i} + R_{min_j}}{2r_{ij}} \right)^6 \right). \quad (S4)$$

$r_{ij}$  is the distance between the two atoms, the two parameters  $\varepsilon_i$  and  $R_{min_i}$  are determined by the Van der Walls radius and the interaction strengths of a given atom. The fixed parameters for each atom type are given in Table S1. The non-bonding interactions are not calculated for bond neighbors or bond neighbors' neighbors. For interactions between atoms which are separated by three bonds the parameters are for some atoms changes slightly as seen for the atoms which has entries in the 1-4 column of Table S1.

Table S2 : The Bond force constants,  $K_{ij}^b$ , and equilibrium distances,  $b_{ij}^0$ , for the PA6 force field. The  $C_L$ ,  $C_R$ ,  $C_A$  and  $C_{CN}$  atom types can here be substituted in place of C, as the bond parameters are similar for these five types of carbon. The same applies to the attached hydrogen  $H_L$ ,  $H_R$ ,  $H_A$  and  $H_{CN}$ , which can be substituted in place for H.

| Bond type           | $K_{ij}^b$ (kcal/mol) | $b_{ij}^0$ (Å) |
|---------------------|-----------------------|----------------|
| C-C                 | 222.50                | 1.530          |
| C-H                 | 309.00                | 1.111          |
| $C_L$ -N            | 320.00                | 1.430          |
| N- $H_N$            | 440.00                | 0.997          |
| N- $C_O$            | 370.00                | 1.345          |
| $C_O$ -O            | 620.00                | 1.230          |
| $C_O$ - $C_R$       | 250.00                | 1.490          |
| $N_Z$ - $H_Z$       | 460.0                 | 1.000          |
| $C_{CN}$ - $N_Z$    | 240.0                 | 1.430          |
| C- $C_{CL}$         | 200.0                 | 1.522          |
| $C_{CL}$ - $O_{BL}$ | 750.0                 | 1.220          |
| $C_{CL}$ - $O_{HL}$ | 230.0                 | 1.400          |
| $O_{HL}$ - $H_{OL}$ | 545.0                 | 0.960          |

The bonded interactions are composed of the following in terms in this study

$$V_{bonded} = V_{bond} + V_{ang} + V_{UB} + V_{dih} + V_{imp}. \quad (S5)$$

The contribution from the bonds between atom  $i$  and  $j$  are calculated as follows,

$$V_{bond}(b_{ij}) = K_{ij}^b(b_{ij} - b_{ij}^0)^2. \quad (S6)$$

Where  $b_{ij}$  is the distance between the two bonded atoms,  $b_{ij}^0$  is the equilibrium distance and  $K_{ij}^b$  is the bonds force constant. The equilibrium distances and force constants used in this study are given in Table S2.

Table S3: Angle and Urey-Bradley parameters for the PA6 force field. The substitutions C to C, C<sub>L</sub>, C<sub>R</sub>, C<sub>A</sub> or C<sub>CN</sub>; and H to H, H<sub>L</sub>, H<sub>R</sub>, H<sub>A</sub> or H<sub>CN</sub> applies here as described in Table S2.

| Angle type                                        | $K_{ijk}^\theta$ ((kcal/mol)/Rad <sup>2</sup> ) | $\theta_{ijk}^0$ (Degrees) | $K_{ik}^{UB}$ ((kcal/mol)/Å <sup>2</sup> ) | $S_{ik}^0$ (Å) |
|---------------------------------------------------|-------------------------------------------------|----------------------------|--------------------------------------------|----------------|
| C-C-C                                             | 58.350                                          | 113.60                     | 11.16                                      | 2.561          |
| H-C-C                                             | 26.500                                          | 110.10                     | 22.53                                      | 2.179          |
| H-C-H                                             | 35.500                                          | 109.00                     | 5.40                                       | 1.8020         |
| C <sub>O</sub> -C-C                               | 52.000                                          | 108.00                     | -                                          | -              |
| O-C <sub>O</sub> -C                               | 80.000                                          | 121.00                     | -                                          | -              |
| H-C-C <sub>O</sub>                                | 33.000                                          | 109.50                     | 30.00                                      | 1.630          |
| O-C <sub>O</sub> -N                               | 80.000                                          | 122.50                     | -                                          | -              |
| N-C <sub>O</sub> -C                               | 80.000                                          | 116.50                     | -                                          | -              |
| H <sub>N</sub> -N-C                               | 34.000                                          | 123.00                     | -                                          | -              |
| CO-N-C                                            | 50.000                                          | 120.00                     | -                                          | -              |
| HN-N-C                                            | 35.000                                          | 117.00                     | -                                          | -              |
| N-C-C                                             | 70.000                                          | 113.50                     | -                                          | -              |
| N-C-H                                             | 35.000                                          | 117.00                     | -                                          | -              |
| H <sub>Z</sub> -N <sub>Z</sub> -H <sub>Z</sub>    | 39.000                                          | 106.5                      | -                                          | -              |
| H <sub>Z</sub> -N <sub>Z</sub> -C                 | 50.000                                          | 111.0                      | -                                          | -              |
| C-C-N <sub>Z</sub>                                | 67.700                                          | 110.0                      | -                                          | -              |
| N <sub>Z</sub> -C-H                               | 38.000                                          | 109.5                      | 50.00                                      | 2.1400         |
| O <sub>BL</sub> -C <sub>CL</sub> -C               | 70.0                                            | 125.0                      | 20.0                                       | 2.442          |
| O <sub>HL</sub> -C <sub>CL</sub> -C               | 55.0                                            | 110.5                      | -                                          | -              |
| H <sub>OL</sub> -O <sub>HL</sub> -C <sub>CL</sub> | 55.0                                            | 115.0                      | -                                          | -              |
| O <sub>HL</sub> -C <sub>CL</sub> -O <sub>BL</sub> | 50.0                                            | 123.0                      | 210.0                                      | 2.262          |

The bond angle is defined as another harmonic potential,

$$V_{ang}(\theta_{ijk}) = K_{ijk}^\theta (\theta_{ijk} - \theta_{ijk}^0)^2. \quad (S7)$$

Here  $K_\theta$  is the force parameter and  $\theta_{ijk}^0$  is the equilibrium angle. The Urey-Bradley (UB) terms further alter the interactions defined over two bonds. Their argument is the distance,  $S_{ik}$ , between the first and third atom in the angle definition.

$$V_{UB}(S_{ik}) = K_{ik}^{UB} (S_{ik} - S_{ik}^0)^2, \quad (S8)$$

where  $K_{ik}^{UB}$  is the force constant and  $S_{ik}^0$  is the equilibrium distance. The parameters for PA6 angle and UB terms are given in Table S3, where it should be noted that only a select number of interactions through two bonds have UB terms.

Table S4: Dihedral parameters for the PA6 force field. The X symbols are used to denote that any atom type can be at this position. The substitutions C to C, C<sub>L</sub>, C<sub>R</sub>, C<sub>A</sub> or C<sub>CN</sub>; and H to H, H<sub>L</sub>, H<sub>R</sub>, H<sub>A</sub> or H<sub>CN</sub> applies here as described in Table S2.

| Dihedral type                                                    | $K_{ijkl}^\chi$ (kcal/mole) | n | $\chi_{ijkl}^0$ (Degrees) |
|------------------------------------------------------------------|-----------------------------|---|---------------------------|
| X-C-C-X                                                          | 0.190                       | 3 | 0.000                     |
| C-C-C-C                                                          | 0.101                       | 2 | 0.000                     |
| C-C-C-C                                                          | 0.142                       | 3 | 180.0                     |
| C-C-C-C                                                          | 0.074                       | 4 | 0.000                     |
| C-C-C-C                                                          | 0.097                       | 5 | 0.000                     |
| O-C <sub>0</sub> -C-C                                            | 1.400                       | 1 | 0.000                     |
| O-C <sub>0</sub> -C-H                                            | 0.000                       | 3 | 180.0                     |
| N-C <sub>0</sub> -C-H                                            | 0.000                       | 3 | 0.000                     |
| H <sub>N</sub> -N-C <sub>0</sub> -O                              | 0.530                       | 1 | 0.000                     |
| H <sub>N</sub> -N-C <sub>0</sub> -O                              | 1.270                       | 2 | 180.0                     |
| H <sub>N</sub> -N-C <sub>0</sub> -O                              | 0.140                       | 3 | 0.000                     |
| H <sub>N</sub> -N-C <sub>0</sub> -O                              | 0.780                       | 4 | 0.000                     |
| H <sub>N</sub> -N-C <sub>0</sub> -C                              | 2.500                       | 2 | 180.0                     |
| C-C-C <sub>0</sub> -N                                            | 1.990                       | 1 | 0.000                     |
| C-C-C <sub>0</sub> -N                                            | 0.640                       | 2 | 180.0                     |
| C-C-C <sub>0</sub> -N                                            | 0.280                       | 3 | 180.0                     |
| C-N-C <sub>0</sub> -C                                            | 0.000                       | 1 | 0.000                     |
| C <sub>0</sub> -N-C-H                                            | 0.000                       | 3 | 0.000                     |
| C <sub>0</sub> -N-C-C                                            | 1.800                       | 1 | 0.000                     |
| O-C <sub>0</sub> -N-C                                            | 2.500                       | 2 | 180.0                     |
| H <sub>N</sub> -N-C-H                                            | 0.000                       | 3 | 0.000                     |
| H <sub>N</sub> -N-C-C                                            | 0.000                       | 1 | 0.000                     |
| H <sub>Z</sub> -N <sub>Z</sub> -C-H                              | 0.11000                     | 3 | 0.0000                    |
| C-C-N <sub>Z</sub> -H <sub>Z</sub>                               | 0.11000                     | 3 | 0.0000                    |
| C-C-C-C <sub>CL</sub>                                            | 0.000                       | 5 | 180.0                     |
| C-C-C-C <sub>CL</sub>                                            | 0.317                       | 3 | 180.0                     |
| C-C-C-C <sub>CL</sub>                                            | 0.557                       | 2 | 0.000                     |
| C-C-C-C <sub>CL</sub>                                            | 0.753                       | 1 | 0.000                     |
| O <sub>BL</sub> -C <sub>CL</sub> -C <sub>A</sub> -H <sub>A</sub> | 0.000                       | 6 | 180.0                     |
| H <sub>A</sub> -C <sub>A</sub> -C <sub>CL</sub> -O <sub>HL</sub> | 0.000                       | 6 | 180.0                     |
| X-C <sub>CL</sub> -O <sub>HL</sub> -X                            | 2.050                       | 2 | 180.0                     |

The final two bonded interactions of Eq. (S5) are the dihedral and improper terms. These are defined by the dihedral,  $\chi_{ijkl}$ , and improper angles,  $\psi_{ijkl}$ , between atoms connected over three bonds. The dihedral term is given as

$$V_{dih}(\chi_{ijkl}) = K_{ijkl}^{\chi} (1 + \cos(n\chi_{ijkl} - \chi_{ijkl}^0)), \quad (S9)$$

with the force parameter  $K_{ijkl}^{\chi}$  and equilibrium angle  $\chi_{ijkl}^0$ . The parameter  $n$  is an integer, which modulates the number of minima and maxima in the potential term. There can be several different terms with different  $n$ 's determining the total dihedral potential of a given angle. The improper angle terms are defined as a simple harmonic term

$$V_{imp}(\psi_{ijkl}) = K_{ijkl}^{\psi} (\psi_{ijkl} - \psi_{ijkl}^0)^2, \quad (S10)$$

with the force constant  $K_{\psi}$  and equilibrium angle  $\psi_0$ . The dihedral parameters for PA6 are given in Table S4 and the improper parameters in Table S5.

Table S5: Improper parameters for the PA6 force field. The X symbols denote that any atom type can be placed in the given position.

| Improper type        | $K_{ijkl}^{\psi}$ ((kcal/mol)/rad <sup>2</sup> ) | $\psi_{ijkl}^0$ (Degrees) |
|----------------------|--------------------------------------------------|---------------------------|
| N-X-X-H <sub>N</sub> | 20.00                                            | 0.000                     |
| O-X-X-C <sub>O</sub> | 120.0                                            | 0.000                     |

## S2 Molecular Dynamics Movies

The movie of water dynamics, SIMovie.mov, in the PA6 membrane were created using VMD.<sup>5</sup> The first 400 ns of the trajectories of the PA6 membrane containing 2.3 wt %, 4.5 wt %, 8.6 wt %, and 15.9 wt % water were used to generate the movie. Every 50<sup>th</sup> frame from the molecular dynamics (MD) production run were rendered and used in the encoding of the final movie, corresponding to 0.5 ns of MD simulation time between each frame used.

### S3 H-Bond Strength in the NMA Clusters

The H-bond strength of bonds formed by water and amide can be described based on fragmentation energies. The H-bond strength is calculated by considering the electronic ground state energy of the cluster and those of the fragments created upon breaking the H-bond in question. For example, the H-bond energy of the  $\text{N-H}\cdots\text{O}=\text{C}$  H-bond in the 1A-A-1A cluster is calculated as

$$E_{HB}(1A-A-1A) = E_0(1A-A-) - E_0(-A-) - E_0(1A-A-1A). \quad (\text{S11})$$

The resulting H-bond strengths are given in Figures S2 and S3 for the  $\text{N-H}\cdots\text{X}$  and  $\text{C}=\text{O}\cdots\text{H}$  H-bonds, respectively.

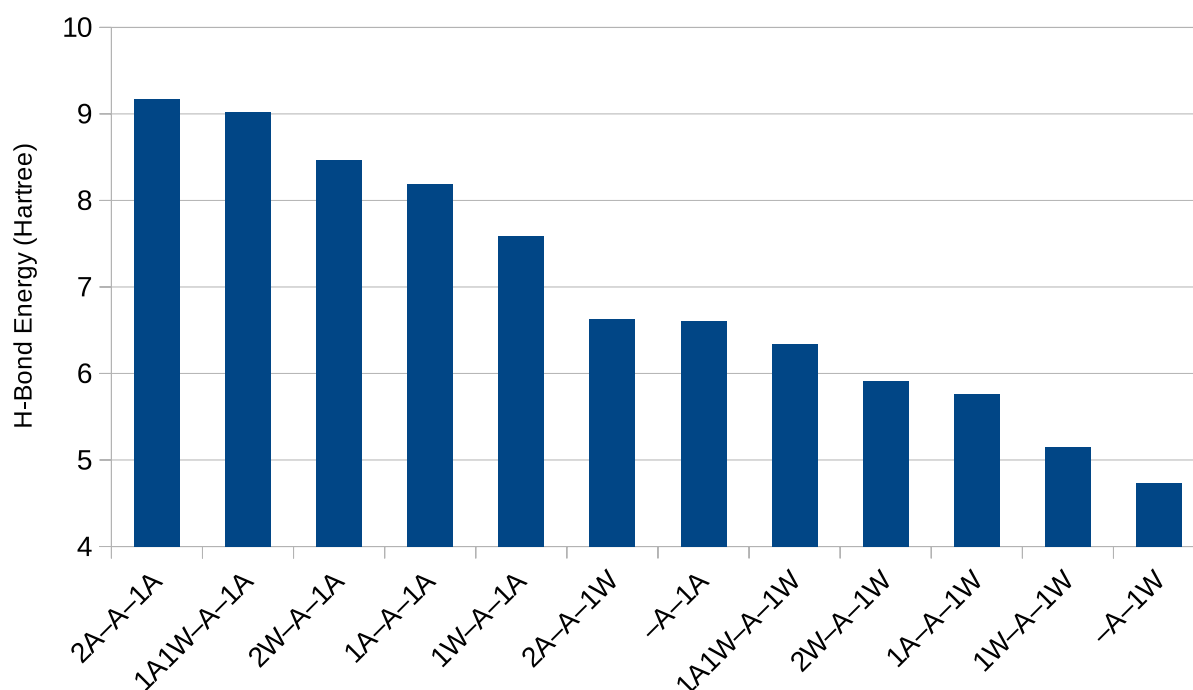

Figure S2: The H-bond strength of the  $\text{N-H}\cdots\text{X}$  bonds in the amide clusters. The cluster types are sorted according to energy, *i.e.* the left most cluster has the strongest  $\text{N-H}\cdots\text{X}$  H-bond.

We find that the H-bond strength of the  $\text{N-H}\cdots\text{X}$  and  $\text{C}=\text{O}\cdots\text{H}$  follows the trends in red shifts seen in amide A and I, respectively, whereas the blue shift of amide II follows the strength of the  $\text{N-H}\cdots\text{X}$



X H-bond. This is because a stronger H-bond indicates a weakening of the N-H and C=O bonds participating in the H-bond. In the case of amide II, the bending motion of N-H becomes stiffer with a stronger H-bond acceptor, leading to a blue shift of the vibrational band.

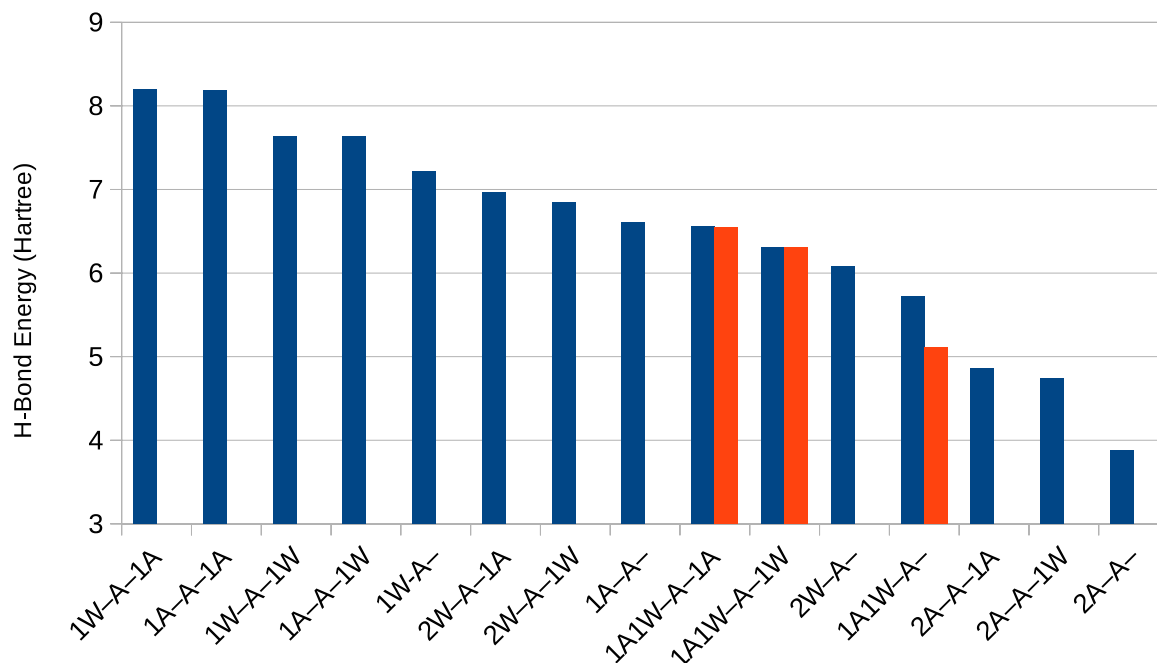

Figure S3: The H-bond strength of the C=O...H bonds in the amide clusters in blue. For the clusters 1A1W-A-1A, 1A1W-A-1W and 1A1W-A- the strength of the H-bond involving amide and C=O are given in red. The cluster types are sorted according to energy, *i.e.* the left most cluster has the strongest N-H...X H-bond.

#### S4 Anharmonic Vibrational Data

In the current study we use forty clusters to model the anharmonic vibrational spectrum of PA6. These clusters and their IR vibrational properties, as well as their concentrations in each MD simulation, are given in Table S6-12. The frequencies are given in  $\text{cm}^{-1}$ , the intensity is given in  $\text{km/mol}$ , and the concentrations in  $\text{mol/L}$ .

Table S6: Structures, concentrations and anharmonic vibrational data, see section C for details.

| 1A-A-1A                                                                             |      |           |       |           |       | 1A-A-1W                                                                              |       |           |       |       |  |
|-------------------------------------------------------------------------------------|------|-----------|-------|-----------|-------|--------------------------------------------------------------------------------------|-------|-----------|-------|-------|--|
| 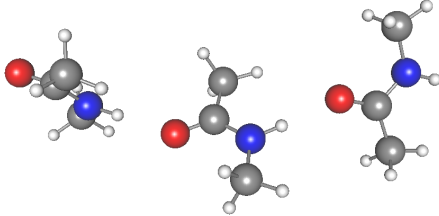   |      |           |       |           |       |    |       |           |       |       |  |
| Motion                                                                              |      | Frequency |       | Intensity |       | Frequency                                                                            |       | Intensity |       |       |  |
| Amide III                                                                           |      | 1312      |       | 74        |       | 1296                                                                                 |       | 70        |       |       |  |
| Amide II                                                                            |      | 1570      |       | 256       |       | 1552                                                                                 |       | 256       |       |       |  |
| Amide I                                                                             |      | 1684      |       | 553       |       | 1692                                                                                 |       | 508       |       |       |  |
| Amide A                                                                             |      | 3354      |       | 663       |       | 3408                                                                                 |       | 349       |       |       |  |
| wt %                                                                                | 0    | 2.3       | 4.5   | 8.6       | 15.9  | 0                                                                                    | 2.3   | 4.5       | 8.6   | 15.9  |  |
| Conc.                                                                               | 3.85 | 2.85      | 1.46  | 0.851     | 0.197 | 0                                                                                    | 0.379 | 0.604     | 0.513 | 0.296 |  |
| 1A-A-                                                                               |      |           |       |           |       | 1A1W-A-                                                                              |       |           |       |       |  |
|   |      |           |       |           |       |   |       |           |       |       |  |
| Motion                                                                              |      | Frequency |       | Intensity |       | Frequency                                                                            |       | Intensity |       |       |  |
| Amide III                                                                           |      | 1259      |       | 57        |       | 1272                                                                                 |       | 46        |       |       |  |
| Amide II                                                                            |      | 1519      |       | 271       |       | 1530                                                                                 |       | 258       |       |       |  |
| Amide I                                                                             |      | 1701      |       | 466       |       | 1677                                                                                 |       | 463       |       |       |  |
| Amide A                                                                             |      | 3505      |       | 31        |       | 3504                                                                                 |       | 37        |       |       |  |
| wt %                                                                                | 0    | 2.3       | 4.5   | 8.6       | 15.9  | 0                                                                                    | 2.3   | 4.5       | 8.6   | 15.9  |  |
| Conc.                                                                               | 1.70 | 1.18      | 1.01  | 0.576     | 0.207 | 0                                                                                    | 0.120 | 0.248     | 0.329 | 0.335 |  |
| 1A1W-A-1W                                                                           |      |           |       |           |       | 1A1W-A-1A                                                                            |       |           |       |       |  |
|  |      |           |       |           |       |  |       |           |       |       |  |
| Motion                                                                              |      | Frequency |       | Intensity |       | Frequency                                                                            |       | Intensity |       |       |  |
| Amide III                                                                           |      | 1313      |       | 57        |       | 1329                                                                                 |       | 68        |       |       |  |
| Amide II                                                                            |      | 1568      |       | 251       |       | 1583                                                                                 |       | 258       |       |       |  |
| Amide I                                                                             |      | 1669      |       | 556       |       | 1661                                                                                 |       | 542       |       |       |  |
| Amide A                                                                             |      | 3393      |       | 387       |       | 3323                                                                                 |       | 733       |       |       |  |
| wt %                                                                                | 0    | 2.3       | 4.5   | 8.6       | 15.9  | 0                                                                                    | 2.3   | 4.5       | 8.6   | 15.9  |  |
| Conc.                                                                               | 0    | 0.040     | 0.115 | 0.286     | 0.434 | 0                                                                                    | 0.238 | 0.385     | 0.488 | 0.400 |  |

Table S7: Structures, concentrations and anharmonic vibrational data, see section C for details.

| 1W-A-1A                                                                             |   |           |       |           |       | 1W-A-1W                                                                              |       |           |       |       |  |
|-------------------------------------------------------------------------------------|---|-----------|-------|-----------|-------|--------------------------------------------------------------------------------------|-------|-----------|-------|-------|--|
| 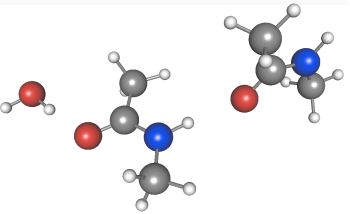   |   |           |       |           |       |    |       |           |       |       |  |
| Motion                                                                              |   | Frequency |       | Intensity |       | Frequency                                                                            |       | Intensity |       |       |  |
| Amide III                                                                           |   | 1314      |       | 75        |       | 1296                                                                                 |       | 73        |       |       |  |
| Amide II                                                                            |   | 1570      |       | 244       |       | 1553                                                                                 |       | 230       |       |       |  |
| Amide I                                                                             |   | 1682      |       | 448       |       | 1695                                                                                 |       | 406       |       |       |  |
| Amide A                                                                             |   | 3345      |       | 624       |       | 3413                                                                                 |       | 311       |       |       |  |
| wt %                                                                                | 0 | 2.3       | 4.5   | 8.6       | 15.9  | 0                                                                                    | 2.3   | 4.5       | 8.6   | 15.9  |  |
| Conc.                                                                               | 0 | 1.00      | 1.57  | 1.32      | 0.797 | 0                                                                                    | 0.186 | 0.386     | 1.07  | 1.18  |  |
| 1W-A-                                                                               |   |           |       |           |       | 2A-A-1A                                                                              |       |           |       |       |  |
|   |   |           |       |           |       |   |       |           |       |       |  |
| Motion                                                                              |   | Frequency |       | Intensity |       | Frequency                                                                            |       | Intensity |       |       |  |
| Amide III                                                                           |   | 1260      |       | 57        |       | 1324                                                                                 |       | 68        |       |       |  |
| Amide II                                                                            |   | 1519      |       | 270       |       | 1577                                                                                 |       | 309       |       |       |  |
| Amide I                                                                             |   | 1696      |       | 370       |       | 1653                                                                                 |       | 511       |       |       |  |
| Amide A                                                                             |   | 3507      |       | 28        |       | 3338                                                                                 |       | 702       |       |       |  |
| wt %                                                                                | 0 | 2.3       | 4.5   | 8.6       | 15.9  | 0                                                                                    | 2.3   | 4.5       | 8.6   | 15.9  |  |
| Conc.                                                                               | 0 | 0.460     | 0.952 | 1.07      | 1.02  | 0.243                                                                                | 0.283 | 0.200     | 0.068 | 0.083 |  |
| 2A-A-1W                                                                             |   |           |       |           |       | 2A-A-                                                                                |       |           |       |       |  |
|  |   |           |       |           |       |  |       |           |       |       |  |
| Motion                                                                              |   | Frequency |       | Intensity |       | Frequency                                                                            |       | Intensity |       |       |  |
| Amide III                                                                           |   | 1309      |       | 59        |       | 1271                                                                                 |       | 47        |       |       |  |
| Amide II                                                                            |   | 1564      |       | 258       |       | 1530                                                                                 |       | 264       |       |       |  |
| Amide I                                                                             |   | 1666      |       | 512       |       | 1678                                                                                 |       | 485       |       |       |  |
| Amide A                                                                             |   | 3386      |       | 414       |       | 3501                                                                                 |       | 39        |       |       |  |
| wt %                                                                                | 0 | 2.3       | 4.5   | 8.6       | 15.9  | 0                                                                                    | 2.3   | 4.5       | 8.6   | 15.9  |  |
| Conc.                                                                               | 0 | 0.059     | 0.061 | 0.072     | 0.075 | 0.110                                                                                | 0.067 | 0.072     | 0.047 | 0.043 |  |

Table S8: Structures, concentrations and anharmonic vibrational data, see section C for details.

|                                                                                                     |   |           |       |           |       |                                                                                                      |       |           |       |       |  |
|-----------------------------------------------------------------------------------------------------|---|-----------|-------|-----------|-------|------------------------------------------------------------------------------------------------------|-------|-----------|-------|-------|--|
| <b>2W-A-1W</b><br>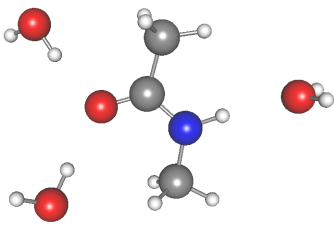 |   |           |       |           |       | <b>2W-A-1A</b><br> |       |           |       |       |  |
| Motion                                                                                              |   | Frequency |       | Intensity |       | Frequency                                                                                            |       | Intensity |       |       |  |
| Amide III                                                                                           |   | 1313      |       | 58        |       | 1327                                                                                                 |       | 70        |       |       |  |
| Amide II                                                                                            |   | 1567      |       | 245       |       | 1583                                                                                                 |       | 242       |       |       |  |
| Amide I                                                                                             |   | 1664      |       | 461       |       | 1667                                                                                                 |       | 474       |       |       |  |
| Amide A                                                                                             |   | 3398      |       | 361       |       | 3310                                                                                                 |       | 641       |       |       |  |
| wt %                                                                                                | 0 | 2.3       | 4.5   | 8.6       | 15.9  | 0                                                                                                    | 2.3   | 4.5       | 8.6   | 15.9  |  |
| Conc.                                                                                               | 0 | 0.008     | 0.051 | 0.353     | 0.998 | 0                                                                                                    | 0.063 | 0.161     | 0.442 | 0.777 |  |
| <b>2W-A-</b><br>  |   |           |       |           |       | <b>-A-1A</b><br>  |       |           |       |       |  |
| Motion                                                                                              |   | Frequency |       | Intensity |       | Frequency                                                                                            |       | Intensity |       |       |  |
| Amide III                                                                                           |   | 1276      |       | 43        |       | 1289                                                                                                 |       | 99        |       |       |  |
| Amide II                                                                                            |   | 1535      |       | 257       |       | 1554                                                                                                 |       | 223       |       |       |  |
| Amide I                                                                                             |   | 1671      |       | 423       |       | 1711                                                                                                 |       | 362       |       |       |  |
| Amide A                                                                                             |   | 3502      |       | 33        |       | 3369                                                                                                 |       | 544       |       |       |  |
| wt %                                                                                                | 0 | 2.3       | 4.5   | 8.6       | 15.9  | 0                                                                                                    | 2.3   | 4.5       | 8.6   | 15.9  |  |
| Conc.                                                                                               | 0 | 0.037     | 0.075 | 0.300     | 0.883 | 2.05                                                                                                 | 1.16  | 0.689     | 0.291 | 0.047 |  |
| <b>-A-1W</b><br> |   |           |       |           |       | <b>-A-</b><br>  |       |           |       |       |  |
| Motion                                                                                              |   | Frequency |       | Intensity |       | Frequency                                                                                            |       | Intensity |       |       |  |
| Amide III                                                                                           |   | 1273      |       | 93        |       | 1240                                                                                                 |       | 77        |       |       |  |
| Amide II                                                                                            |   | 1536      |       | 227       |       | 1504                                                                                                 |       | 244       |       |       |  |
| Amide I                                                                                             |   | 1716      |       | 328       |       | 1726                                                                                                 |       | 302       |       |       |  |
| Amide A                                                                                             |   | 3429      |       | 271       |       | 3506                                                                                                 |       | 21        |       |       |  |
| wt %                                                                                                | 0 | 2.3       | 4.5   | 8.6       | 15.9  | 0                                                                                                    | 2.3   | 4.5       | 8.6   | 15.9  |  |
| Conc.                                                                                               | 0 | 0.185     | 0.248 | 0.225     | 0.071 | 1.15                                                                                                 | 0.558 | 0.484     | 0.228 | 0.061 |  |

Table S9: Structures, concentrations and anharmonic vibrational data, see section C for details.

|                                                                                                       |   |           |       |           |       |                                                                                                          |       |           |       |       |
|-------------------------------------------------------------------------------------------------------|---|-----------|-------|-----------|-------|----------------------------------------------------------------------------------------------------------|-------|-----------|-------|-------|
| <b>2W-W-1A1W</b><br>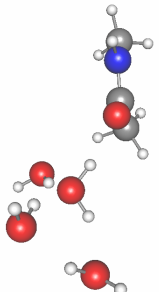 |   |           |       |           |       | <b>1W-W-1W</b><br>    |       |           |       |       |
| Motion                                                                                                |   | Frequency |       | Intensity |       | Frequency                                                                                                |       | Intensity |       |       |
| Bend                                                                                                  |   | 1594      |       | 36        |       | 1569                                                                                                     |       | 73        |       |       |
| H-Stretch                                                                                             |   | 3214      |       | 797       |       | 3356                                                                                                     |       | 424       |       |       |
| H-Stretch                                                                                             |   | 3431      |       | 564       |       | 3703                                                                                                     |       | 80        |       |       |
| wt %                                                                                                  | 0 | 2.3       | 4.5   | 8.6       | 15.9  | 0                                                                                                        | 2.3   | 4.5       | 8.6   | 15.9  |
| Conc.                                                                                                 | 0 | 0.003     | 0.015 | 0.054     | 0.517 | 0                                                                                                        | 0.005 | 0.015     | 0.090 | 0.403 |
| <b>1W-W-2A</b><br>  |   |           |       |           |       | <b>2W-W-2W</b><br>   |       |           |       |       |
| Motion                                                                                                |   | Frequency |       | Intensity |       | Frequency                                                                                                |       | Intensity |       |       |
| Bend                                                                                                  |   | 1615      |       | 88        |       | 1595                                                                                                     |       | 42        |       |       |
| H-Stretch                                                                                             |   | 3390      |       | 659       |       | 3351                                                                                                     |       | 148       |       |       |
| H-Stretch                                                                                             |   | 3449      |       | 581       |       | 3382                                                                                                     |       | 846       |       |       |
| wt %                                                                                                  | 0 | 2.3       | 4.5   | 8.6       | 15.9  | 0                                                                                                        | 2.3   | 4.5       | 8.6   | 15.9  |
| Conc.                                                                                                 | 0 | 0.166     | 0.296 | 0.800     | 1.21  | 0                                                                                                        | 0.000 | 0.000     | 0.009 | 0.203 |
| <b>1W-W-1A</b><br> |   |           |       |           |       | <b>1W-W-1A1W</b><br> |       |           |       |       |
| Motion                                                                                                |   | Frequency |       | Intensity |       | Frequency                                                                                                |       | Intensity |       |       |
| Bend                                                                                                  |   | 1596      |       | 54        |       | 1581                                                                                                     |       | 43        |       |       |
| H-Stretch                                                                                             |   | 3228      |       | 621       |       | 3319                                                                                                     |       | 721       |       |       |
| H-Stretch                                                                                             |   | 3708      |       | 81        |       | 3484                                                                                                     |       | 667       |       |       |
| wt %                                                                                                  | 0 | 2.3       | 4.5   | 8.6       | 15.9  | 0                                                                                                        | 2.3   | 4.5       | 8.6   | 15.9  |
| Conc.                                                                                                 | 0 | 0.021     | 0.059 | 0.233     | 0.369 | 0                                                                                                        | 0.036 | 0.124     | 0.561 | 1.77  |

Table S10: Structures, concentrations and anharmonic vibrational data, see section C for details.

|                                                                                                           |   |           |       |           |       |                                                                                                        |       |           |       |       |
|-----------------------------------------------------------------------------------------------------------|---|-----------|-------|-----------|-------|--------------------------------------------------------------------------------------------------------|-------|-----------|-------|-------|
| <b>-W-1A</b><br>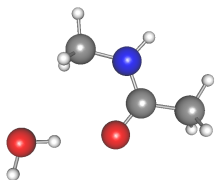         |   |           |       |           |       | <b>1A1W-W-2A</b><br> |       |           |       |       |
| Motion                                                                                                    |   | Frequency |       | Intensity |       | Frequency                                                                                              |       | Intensity |       |       |
| Bend                                                                                                      |   | 1587      |       | 62        |       | 1623                                                                                                   |       | 37        |       |       |
| H-Stretch                                                                                                 |   | 3398      |       | 642       |       | 3263                                                                                                   |       | 1202      |       |       |
| H-Stretch                                                                                                 |   | 3703      |       | 83        |       | 3308                                                                                                   |       | 677       |       |       |
| wt %                                                                                                      | 0 | 2.3       | 4.5   | 8.6       | 15.9  | 0                                                                                                      | 2.3   | 4.5       | 8.6   | 15.9  |
| Conc.                                                                                                     | 0 | 0.042     | 0.108 | 0.093     | 0.080 | 0                                                                                                      | 0.047 | 0.075     | 0.160 | 0.204 |
| <b>1A1W-W-2W</b><br>    |   |           |       |           |       | <b>-W-1A1W</b><br> |       |           |       |       |
| Motion                                                                                                    |   | Frequency |       | Intensity |       | Frequency                                                                                              |       | Intensity |       |       |
| Bend                                                                                                      |   | 1596      |       | 48        |       | 1613                                                                                                   |       | 82        |       |       |
| H-Stretch                                                                                                 |   | 3360      |       | 410       |       | 3471                                                                                                   |       | 364       |       |       |
| H-Stretch                                                                                                 |   | 3414      |       | 734       |       | 3565                                                                                                   |       | 442       |       |       |
| wt %                                                                                                      | 0 | 2.3       | 4.5   | 8.6       | 15.9  | 0                                                                                                      | 2.3   | 4.5       | 8.6   | 15.9  |
| Conc.                                                                                                     | 0 | 0.000     | 0.000 | 0.029     | 0.141 | 0                                                                                                      | 0.040 | 0.117     | 0.249 | 0.320 |
| <b>1A1W-W-1A1W</b><br> |   |           |       |           |       | <b>2W-W-2A</b><br> |       |           |       |       |
| Motion                                                                                                    |   | Frequency |       | Intensity |       | Frequency                                                                                              |       | Intensity |       |       |
| Bend                                                                                                      |   | 1596      |       | 37        |       | 1573                                                                                                   |       | 55        |       |       |
| H-Stretch                                                                                                 |   | 3233      |       | 875       |       | 3248                                                                                                   |       | 825       |       |       |
| H-Stretch                                                                                                 |   | 3405      |       | 613       |       | 3382                                                                                                   |       | 1139      |       |       |
| wt %                                                                                                      | 0 | 2.3       | 4.5   | 8.6       | 15.9  | 0                                                                                                      | 2.3   | 4.5       | 8.6   | 15.9  |
| Conc.                                                                                                     | 0 | 0.005     | 0.041 | 0.144     | 0.358 | 0                                                                                                      | 0.011 | 0.025     | 0.103 | 0.334 |

Table S11: Structures, concentrations and anharmonic vibrational data, see section C for details.

|                                                                                                         |   |           |       |           |       |                                                                                                        |       |           |       |       |  |
|---------------------------------------------------------------------------------------------------------|---|-----------|-------|-----------|-------|--------------------------------------------------------------------------------------------------------|-------|-----------|-------|-------|--|
| <b>-W-1W</b><br>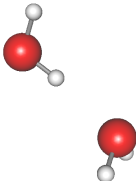       |   |           |       |           |       | <b>1A-W-1W</b><br>   |       |           |       |       |  |
| Motion                                                                                                  |   | Frequency |       | Intensity |       | Frequency                                                                                              |       | Intensity |       |       |  |
| Bend                                                                                                    |   | 1565      |       | 59        |       | 1583                                                                                                   |       | 64        |       |       |  |
| H-Stretch                                                                                               |   | 3485      |       | 363       |       | 3418                                                                                                   |       | 565       |       |       |  |
| H-Stretch                                                                                               |   | 3697      |       | 89        |       | 3707                                                                                                   |       | 98        |       |       |  |
| wt %                                                                                                    | 0 | 2.3       | 4.5   | 8.6       | 15.9  | 0                                                                                                      | 2.3   | 4.5       | 8.6   | 15.9  |  |
| Conc.                                                                                                   | 0 | 0.010     | 0.017 | 0.056     | 0.095 | 0                                                                                                      | 0.025 | 0.025     | 0.086 | 0.149 |  |
| <b>1A-W-2W</b><br>    |   |           |       |           |       | <b>1A-W-1A</b><br>  |       |           |       |       |  |
| Motion                                                                                                  |   | Frequency |       | Intensity |       | Frequency                                                                                              |       | Intensity |       |       |  |
| Bend                                                                                                    |   | 1588      |       | 40        |       | 1603                                                                                                   |       | 54        |       |       |  |
| H-Stretch                                                                                               |   | 3465      |       | 257       |       | 3294                                                                                                   |       | 796       |       |       |  |
| H-Stretch                                                                                               |   | 3507      |       | 775       |       | 3707                                                                                                   |       | 91        |       |       |  |
| wt %                                                                                                    | 0 | 2.3       | 4.5   | 8.6       | 15.9  | 0                                                                                                      | 2.3   | 4.5       | 8.6   | 15.9  |  |
| Conc.                                                                                                   | 0 | 0.028     | 0.023 | 0.132     | 0.350 | 0                                                                                                      | 0.058 | 0.135     | 0.156 | 0.122 |  |
| <b>1A-W-1A1W</b><br> |   |           |       |           |       | <b>1A-W-2A</b><br> |       |           |       |       |  |
| Motion                                                                                                  |   | Frequency |       | Intensity |       | Frequency                                                                                              |       | Intensity |       |       |  |
| Bend                                                                                                    |   | 1599      |       | 36        |       | 1612                                                                                                   |       | 25        |       |       |  |
| H-Stretch                                                                                               |   | 3392      |       | 661       |       | 3357                                                                                                   |       | 258       |       |       |  |
| H-Stretch                                                                                               |   | 3505      |       | 714       |       | 3372                                                                                                   |       | 1676      |       |       |  |
| wt %                                                                                                    | 0 | 2.3       | 4.5   | 8.6       | 15.9  | 0                                                                                                      | 2.3   | 4.5       | 8.6   | 15.9  |  |
| Conc.                                                                                                   | 0 | 0.086     | 0.268 | 0.614     | 0.764 | 0                                                                                                      | 0.506 | 0.710     | 0.791 | 0.444 |  |

Table S12: Structures, concentrations and anharmonic vibrational data, see section C for details.

|                                                                                                           |   |           |       |           |       |                                                                                                            |       |           |       |       |
|-----------------------------------------------------------------------------------------------------------|---|-----------|-------|-----------|-------|------------------------------------------------------------------------------------------------------------|-------|-----------|-------|-------|
| <p><b>-W-2A</b></p> 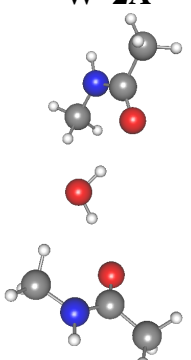     |   |           |       |           |       | <p><b>-W-2W</b></p>     |       |           |       |       |
| Motion                                                                                                    |   | Frequency |       | Intensity |       | Frequency                                                                                                  |       | Intensity |       |       |
| Bend                                                                                                      |   | 1584      |       | 36        |       | 1573                                                                                                       |       | 39        |       |       |
| H-Stretch                                                                                                 |   | 3467      |       | 70        |       | 3509                                                                                                       |       | 92        |       |       |
| H-Stretch                                                                                                 |   | 3513      |       | 968       |       | 3562                                                                                                       |       | 597       |       |       |
| wt %                                                                                                      | 0 | 2.3       | 4.5   | 8.6       | 15.9  | 0                                                                                                          | 2.3   | 4.5       | 8.6   | 15.9  |
| Conc.                                                                                                     | 0 | 0.223     | 0.467 | 0.263     | 0.206 | 0                                                                                                          | 0.014 | 0.006     | 0.042 | 0.154 |
| <p><b>1W-W-2W</b></p>  |   |           |       |           |       | <p><b>2A-W-2A</b></p>  |       |           |       |       |
| Motion                                                                                                    |   | Frequency |       | Intensity |       | Frequency                                                                                                  |       | Intensity |       |       |
| Bend                                                                                                      |   | 1595      |       | 66        |       | 1620                                                                                                       |       | 20        |       |       |
| H-Stretch                                                                                                 |   | 3499      |       | 120       |       | 3263                                                                                                       |       | 1860      |       |       |
| H-Stretch                                                                                                 |   | 3560      |       | 265       |       | 3282                                                                                                       |       | 271       |       |       |
| wt %                                                                                                      | 0 | 2.3       | 4.5   | 8.6       | 15.9  | 0                                                                                                          | 2.3   | 4.5       | 8.6   | 15.9  |
| Conc.                                                                                                     | 0 | 0.014     | 0.003 | 0.097     | 0.751 | 0                                                                                                          | 0.039 | 0.051     | 0.057 | 0.097 |

### S5 Comparison of the amide vibrations

To compare the amide structures and vibrations of the amide chromophores of the clusters used to model the difference IR spectrum we measure the difference between them using a simple scheme.

For the structure we first align the central amide groups by translation of the entire cluster by the



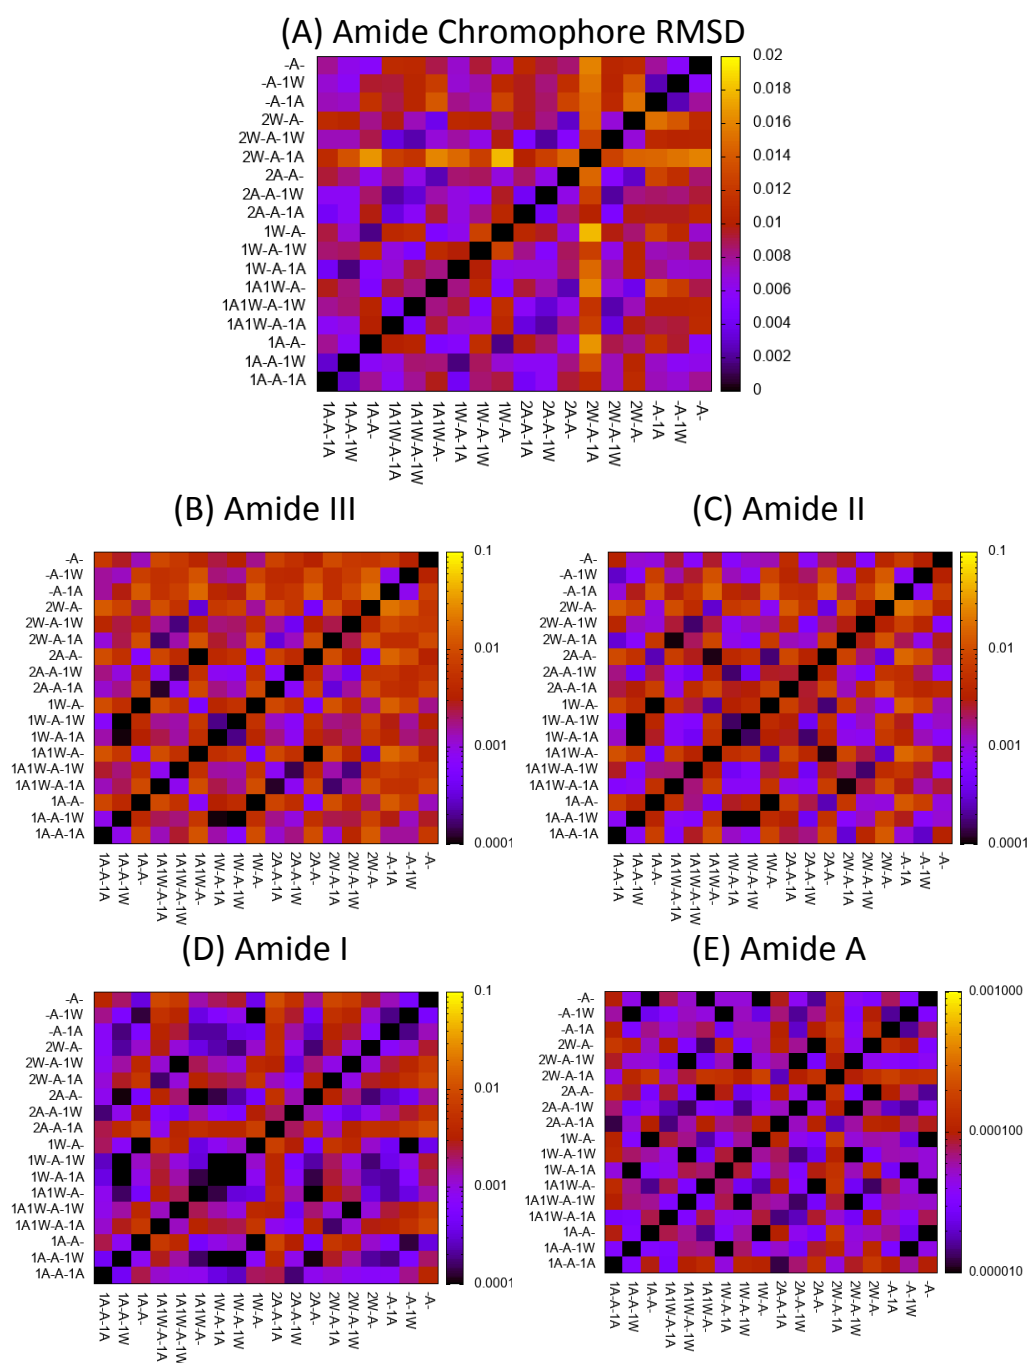

Figure S4: (A) The RMSD of aligned amide chromophores of the clusters used in this study. (B–E)  $\sigma_{jk}^i$  measure for the amide A, I, II and III of the clusters used in this study. In both cases a lower value signifies better agreement between the structures or vibrations, note the log scales on (B)–(E). centroid of the amide chromophore and then apply a fixed rotation for all coordinates of one cluster to minimize the difference between the chromophore coordinates of the two clusters.

The root mean squared deviation (RSMD) between the amide chromophores of the 18 investigated clusters is shown in a heat map representation in Figure S4A. The largest RSMD for the amide groups are 0.018, found between the clusters 2W–A–1A and 1W–A–. As can be seen in the figure the rotated structures are almost identical and we do therefore not expect any major contributions from the changes in internal geometry of the central amide in the vibrations of the cluster.

The rotation used to calculate the RSMD of the amide chromophore is also applied to the vibrational vectors to align the coordinate systems. We can then define the following measure,

$$\sigma_{jk}^i = 1 - v_j^i \cdot \tilde{v}_k. \quad (\text{S11})$$

Where  $v_j$  and  $\tilde{v}_k$  are the coordinate vector of the  $i$ th vibration of the  $j$ th cluster and  $k$ th rotated cluster respectively. A  $\sigma_{jk}^i = 0$  means that the two vibrations are parallel and therefore equal, while  $\sigma_{jk}^i = 1$  means that the vibrations are orthogonal.

Figure S2B-E display the  $\sigma_{jk}^i$  measure for the amide I, II, III and A vibrational vectors. The vectors in all cases very close to being parallel, suggesting that the vibrations generally happen in the same directions for all atoms in the amide group. This, coupled with the fact that the structures of the central amides are highly similar, suggests that a visualization of the vibrations of any one of the clusters would be equally valid for all clusters. We have therefore chosen to show the amide I, II, III and A motion of the –A– cluster in Figure S5A-D to clearly display the motions of an amide chromophore used in this study.

It should here be noted, that while the anharmonic description has vastly different band centers from the harmonic description, the VQDPT2 anharmonic description does not contain any significant mode mixing in any of the clusters investigated in the current study. We therefore expect that the motions of Figure S5 are a good representation of the anharmonic vibrations as well.

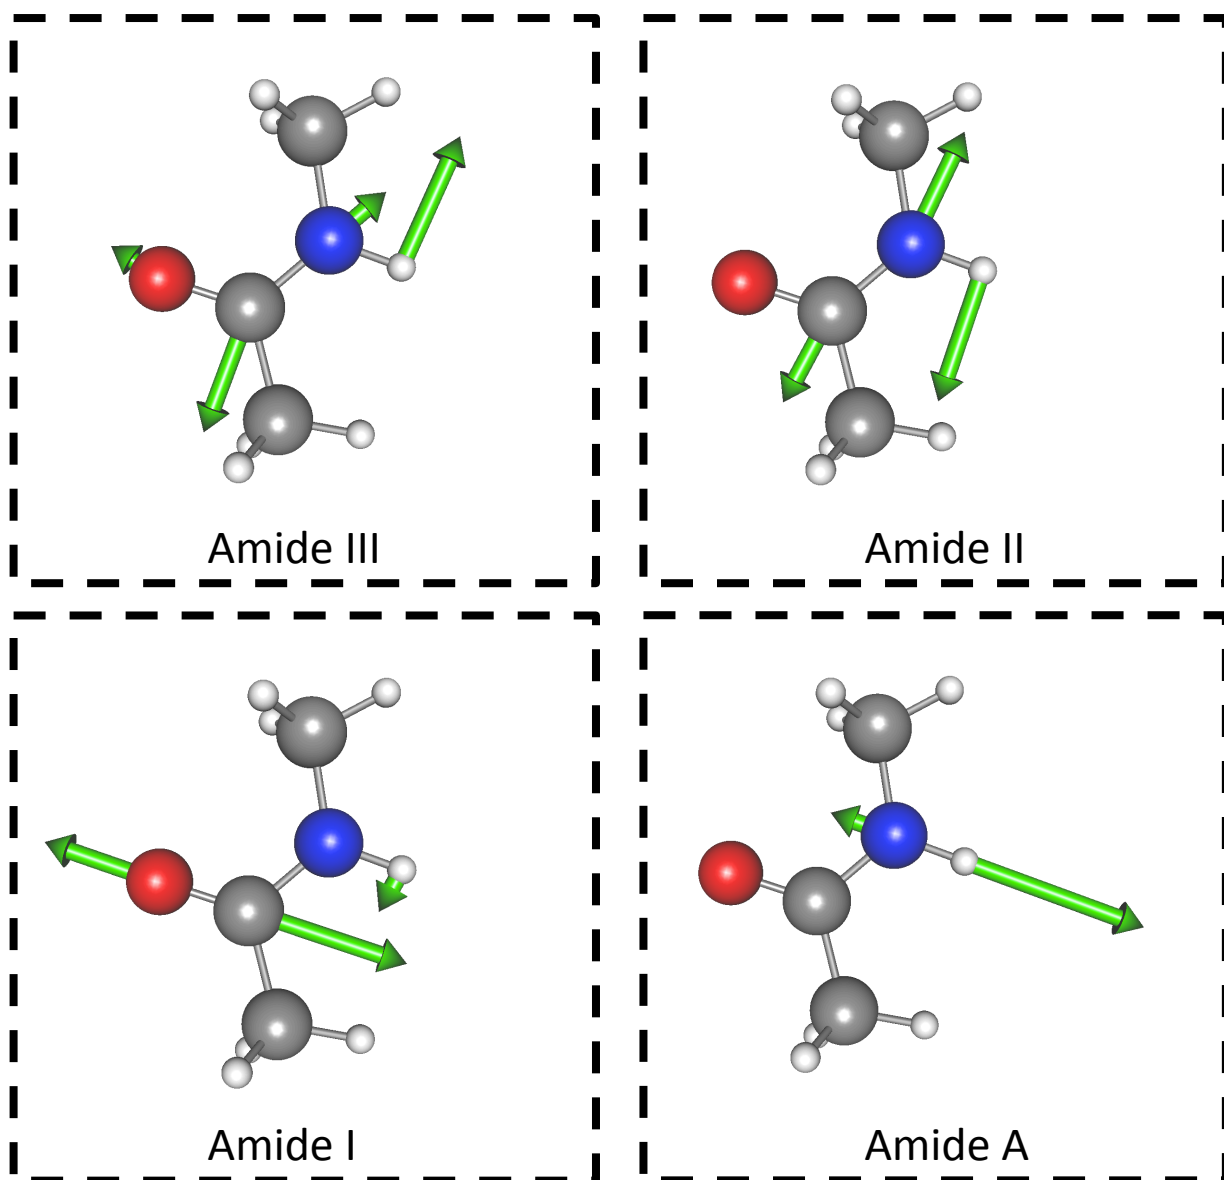

Figure S5: The normal coordinates of amide A, I, II and III of the  $-A-$  cluster, corresponding to N-methyl acetamide (NMA). Note that only the Hessian of the central amide group were diagonalized to obtain these coordinates, as described in the main text.

### S6 Infrared spectra of the five PA6 systems

The anharmonic IR spectrum of the PA6 systems containing 0.0 wt %, 2.3 wt %, 4.5 wt %, 8.62 wt % and 15.9 wt % have been calculated using the data in section C in Eq. (13) and plotted in

Figure S4. As is the case for the difference IR spectra in the main text a broadening factor,  $\gamma$ , of 40  $\text{cm}^{-1}$  and 80  $\text{cm}^{-1}$  have been used in the regions 3000 – 3800  $\text{cm}^{-1}$  and 1400 – 1800  $\text{cm}^{-1}$  respectively. These spectra are vastly different from the experimental spectra of hydrated PA6. This is because the statistic and models used in this study only captures the IR spectrum of the amorphous parts of PA6, where water can enter.

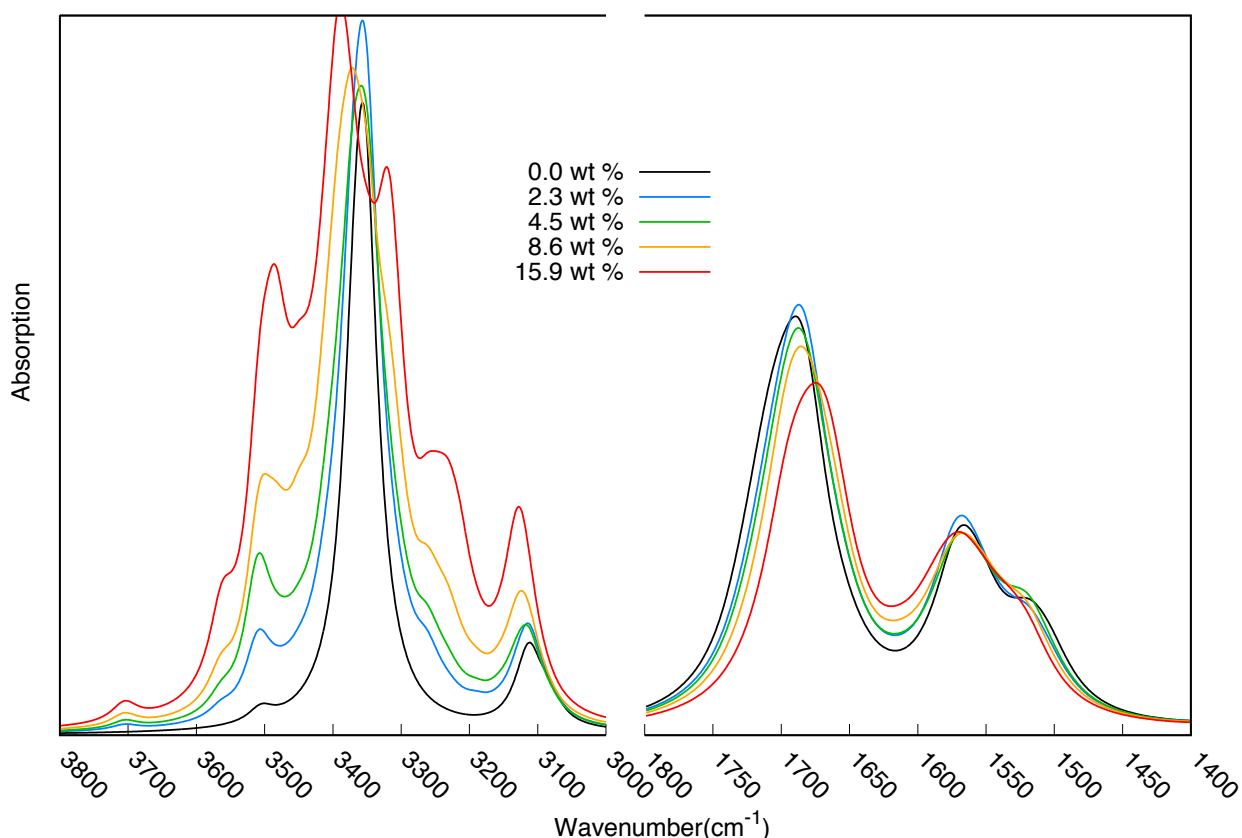

Figure S6: The anharmonic IR spectra of the five PA6 systems used in this study. They are calculated using the data presented in section C in Eq. (13) of the main text.

### S7 Vibrational Shifts of The Amide I, II and A Vibrations

To help in identifying the patterns in the peak positions with respect to the H-bond acceptors and donors of the central amide chromophore three figures showing the vibrational shift when donors

and acceptors are added to the bare amide. The figures, Figure S7-9, are generated using the anharmonic frequencies given in Table S6-8.

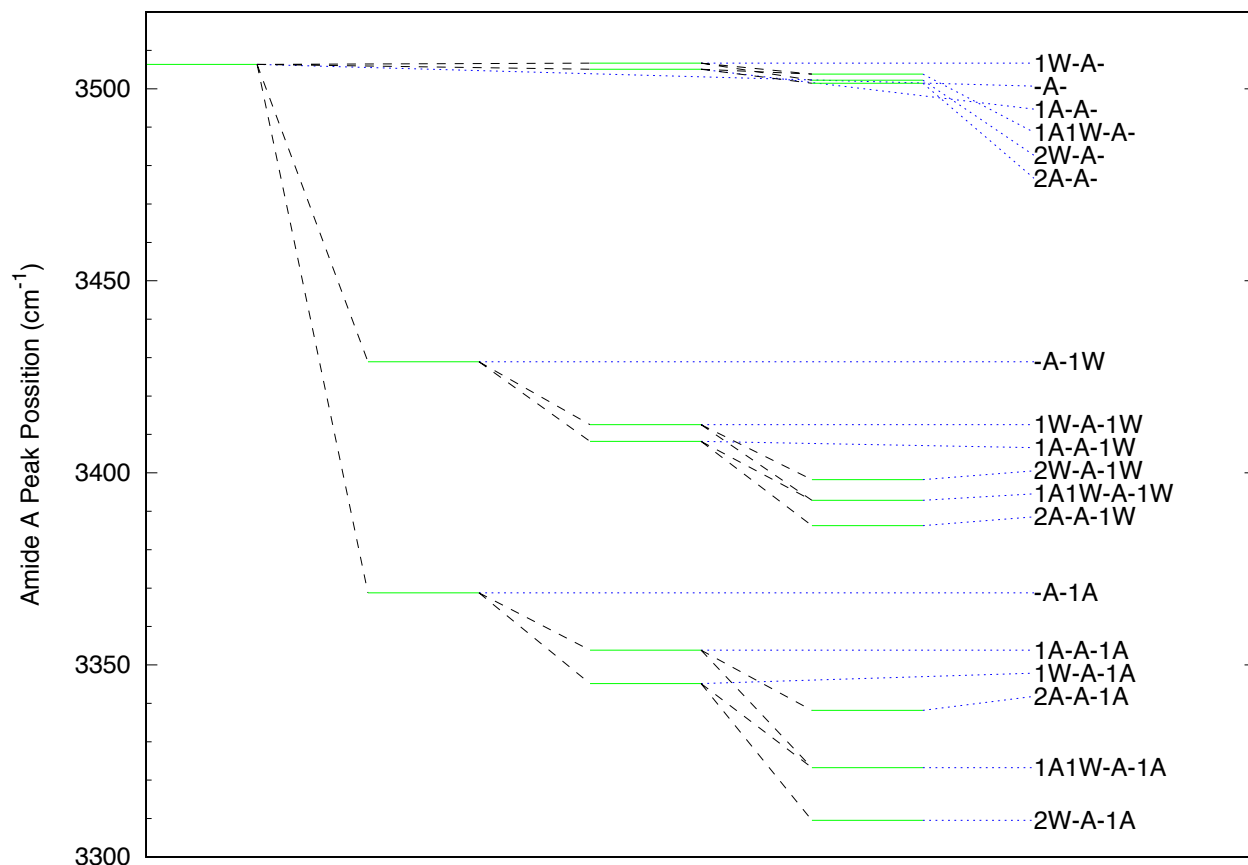

Figure S7: Shifts of the amide A vibrations categorized after H-bond acceptors and donors to the central amide chromophore. The first column corresponds to the bare amide chromophore, while the second adds a H-bond acceptor group. The third column adds the first H-bond donor to the chromophore and the fourth adds a second donor. The cluster names are given in descending order with respect to their amide A peak position.

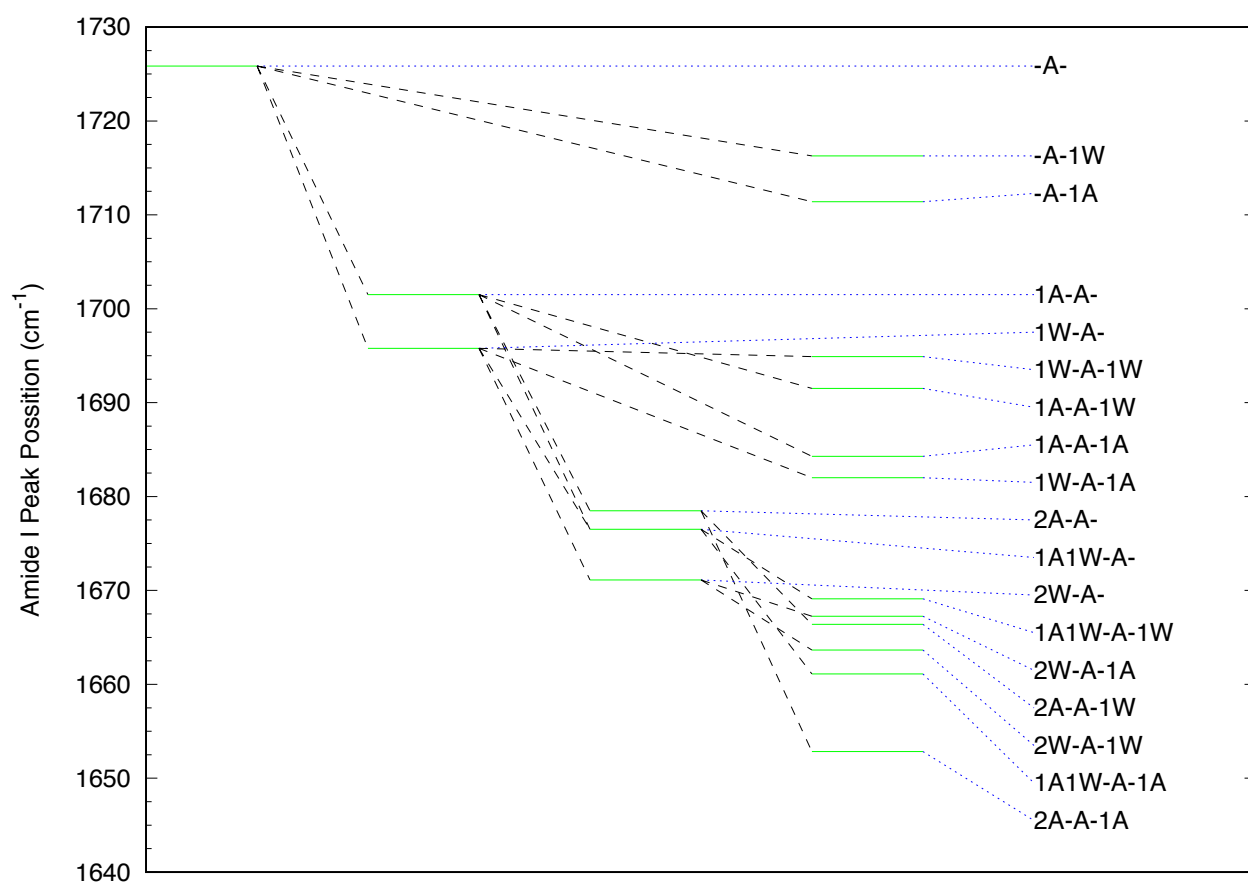

Figure S8: Shifts of the amide I vibrations categorized after H-bond acceptors and donors to the central amide chromophore. The first column corresponds to the bare amide chromophore, while the second and third column adds one or two H-bond donors respectively. The fourth column adds a H-bond acceptor to the central amide chromophore. The cluster names are given in descending order with respect to their amide I peak position.

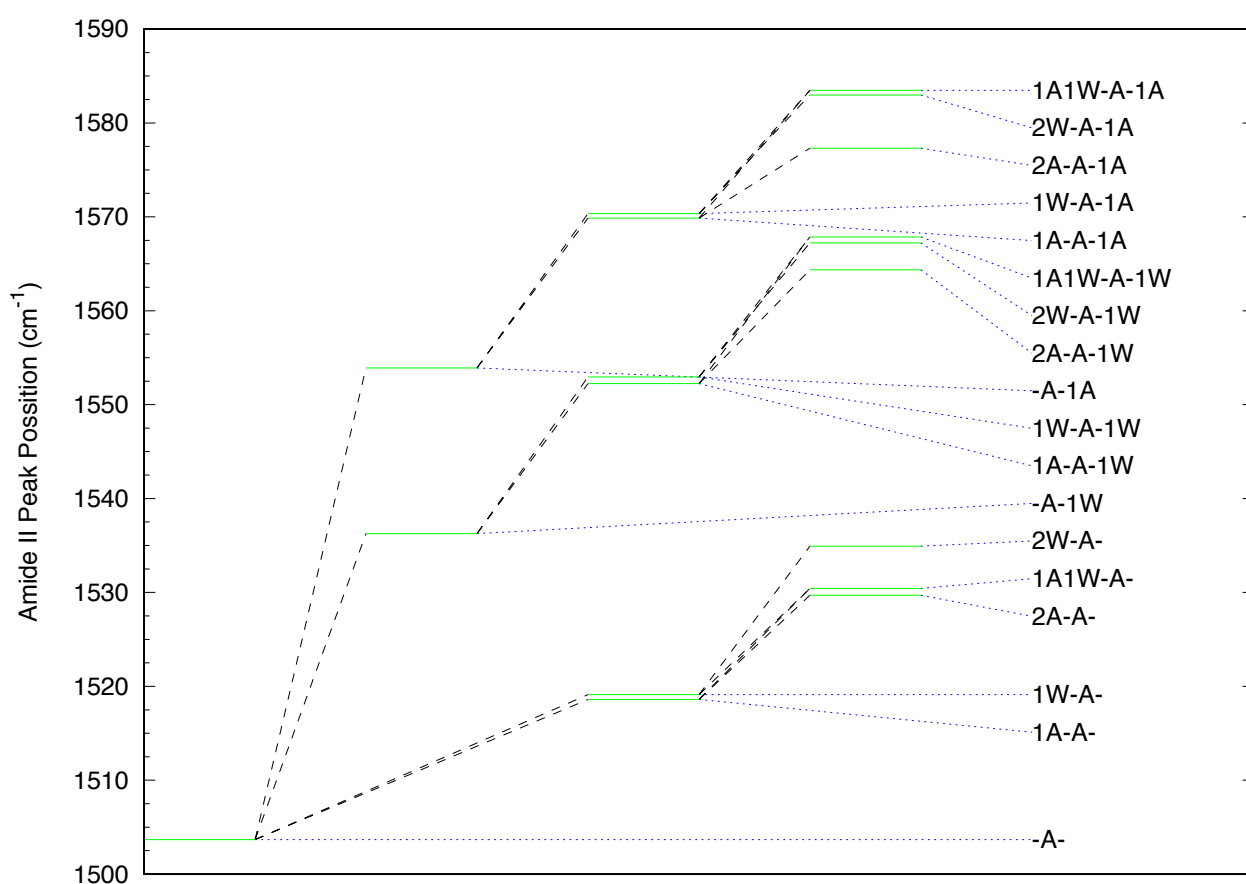

Figure S9: Shifts of the amide II vibrations categorized after H-bond acceptors and donors to the central amide chromophore. The first column corresponds to the bare amide chromophore, while the second adds a H-bond acceptor group. The third column adds the first H-bond donor to the chromophore and the fourth adds a second donor. The cluster names are given in descending order with respect to their amide II peak position.

## S8 References

1. Klauda, J. B.; Venable, R. M.; Freites, J. A.; O'Connor, J. W.; Tobias, D. J.; Mondragon-Ramirez, C.; Vorobyov, I.; MacKerell, A. D.; Pastor, R. W., Update of the CHARMM All-Atom Additive Force Field for Lipids: Validation on Six Lipid Types. *J. Phys. Chem. B* **2010**, *114*, 7830-7843.
2. MacKerell, A. D.; Bashford, D.; Bellott, M.; Dunbrack, R. L.; Evanseck, J. D.; Field, M. J.; Fischer, S.; Gao, J.; Guo, H.; Ha, S., et al., All-Atom Empirical Potential for Molecular Modeling and Dynamics Studies of Proteins. *J. Phys. Chem. B* **1998**, *102*, 3586-3616.

3. Venable, R. M.; Sodt, A. J.; Rogaski, B.; Rui, H.; Hatcher, E.; MacKerell Jr., A. D.; Pastor, R. W.; Klauda, J. B., CHARMM All-Atom Additive Force Field for Sphingomyelin: Elucidation of Hydrogen Bonding and of Positive Curvature. *Biophys. J.* **2014**, *107*, 134-145.
4. Price, D. J.; Iii, C. L. B., A modified TIP3P water potential for simulation with Ewald summation. *J. Chem. Phys.* **2004**, *121*, 10096-10103.
5. Humphrey, W.; Dalke, A.; Schulten, K., VMD: Visual molecular dynamics. *J. Mol. Graph.* **1996**, *14*, 33-38.
